# Supplementary material for: The Strange Case: The Unsymmetric Cisplatin‐Based Pt(IV) Prodrug [Pt(CH3COO)Cl2(NH3)2(OH)] Exhibits Higher Cytotoxic Activity with respect to Its Symmetric Congeners due to Carrier‐Mediated Cellular Uptake
Source: Hindawi journal article supplement (doi:10.1155/2022/3698391), 2022-01-01
Supplement: f1 [file 3698391.f1.pdf]

***The strange case: the unsymmetric cisplatin-based Pt(IV) prodrug [Pt(CH<sub>3</sub>COO)Cl<sub>2</sub>(NH<sub>3</sub>)<sub>2</sub>(OH)] exhibits higher cytotoxic activity with respect to its symmetric congeners due to carrier-mediated cellular uptake***

Elisabetta Gabano,<sup>1</sup> Ilaria Zanellato,<sup>2</sup> Giulia Pinton,<sup>3</sup> Laura Moro,<sup>3</sup> Mauro Ravera,<sup>2</sup> and Domenico Osella,<sup>2</sup>

<sup>1</sup> *Dipartimento per lo Sviluppo Sostenibile e la Transizione Ecologica, Università del Piemonte Orientale, Piazza Sant'Eusebio 5, 13100 Vercelli (Italy)*

<sup>2</sup> *Dipartimento di Scienze e Innovazione Tecnologica, Università del Piemonte Orientale, Viale Michel 11, 15121 Alessandria (Italy)*

<sup>3</sup> *Dipartimento di Scienze del Farmaco, Università del Piemonte Orientale, Via Bovio 6, 28100 Novara (Italy)*

Correspondence should be addressed to Mauro Ravera; [mauro.ravera@uniupo.it](mailto:mauro.ravera@uniupo.it) and Domenico Osella; [domenico.osella@uniupo.it](mailto:domenico.osella@uniupo.it)

## SUPPLEMENTARY MATERIAL

- Figure S1** Sketch of the complexes under investigation.
- Figure S2** [<sup>1</sup>H, <sup>15</sup>N] HSQC spectrum of <sup>15</sup>N-1.
- Figure S3** [<sup>1</sup>H, <sup>15</sup>N] HSQC spectrum of <sup>15</sup>N-1 after 2 h reduction in cell cytosol.
- Figure S4** [<sup>1</sup>H, <sup>15</sup>N] HSQC spectrum of <sup>15</sup>N-2.
- Figure S5** [<sup>1</sup>H, <sup>15</sup>N] HSQC spectrum of <sup>15</sup>N-2 after 2 h reduction in cell cytosol.
- Figure S6** [<sup>1</sup>H, <sup>15</sup>N] HSQC spectrum of <sup>15</sup>N-2 after 2 h reduction in cell cytosol (magnification).
- Figure S7** [<sup>1</sup>H, <sup>15</sup>N] HSQC spectrum of <sup>15</sup>N-3.
- Figure S8** [<sup>1</sup>H, <sup>15</sup>N] HSQC spectrum of <sup>15</sup>N-3 after 2 h reduction in cell cytosol.
- Figure S9** [<sup>1</sup>H, <sup>15</sup>N] HSQC spectrum of <sup>15</sup>N-3 after 2 h reduction in cell cytosol (magnification).
- Figure S10** Accumulation ratio (AR) in A2780 cells treated for 1 h with **1-3** in the absence or in the presence of cimetidine.
- Figure S11** RP-HPLC chromatograms of **3** (100 μM) aged in complete RPMI 1640 at time zero and after 72 h in solution.
- Figure S12** (A) RP-HPLC chromatograms of **2** aged in RPMI 1640 at time zero and after 72 h in solution. (B) ESI-MS spectra of **2** and [**2**-Cl+H<sub>2</sub>O]<sup>+</sup>. (C) Zoomed-in version of (A).

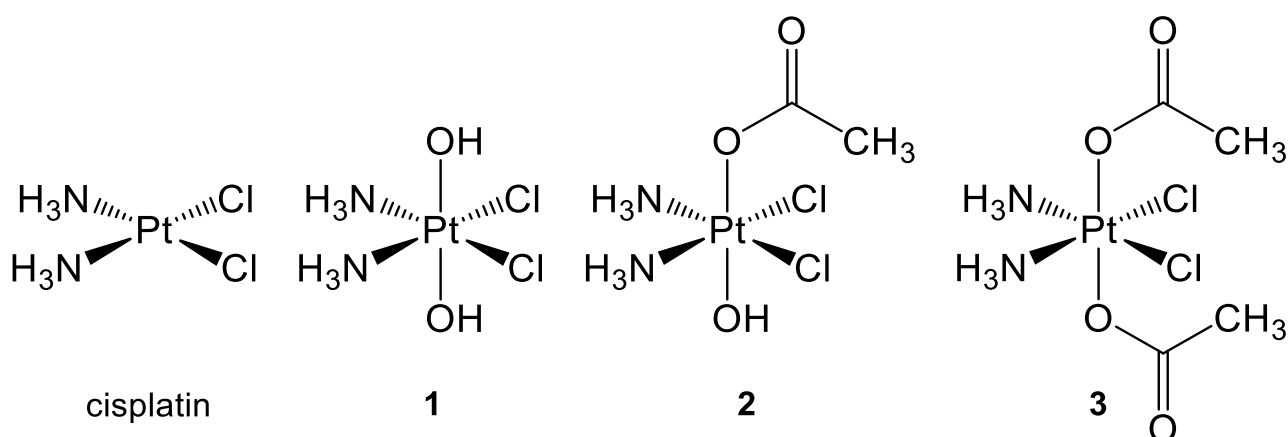

**Figure S1** Sketch of the complexes under investigation.

### Synthesis of the $^{15}\text{NH}_3$ -labeled complexes $^{15}\text{N-1}$ , $^{15}\text{N-2}$ , and $^{15}\text{N-3}$ .

The syntheses of  $^{15}\text{N}$ -labeled complexes started with the preparation of *cis*-[PtCl<sub>2</sub>( $^{15}\text{NH}_3$ )<sub>2</sub>] as previously reported.  $^{15}\text{N}$ -cisplatin was then oxidised with hydrogen peroxide in water to get the dihydroxido complex  $^{15}\text{N-1}$  (with a microwave-assisted heating) or in acetic acid to get the monoacetato complex  $^{15}\text{N-2}$ . Finally, the diacetato complex  $^{15}\text{N-3}$  was obtained from the reaction between  $^{15}\text{N-1}$  and acetic anhydride.

**$^{15}\text{N-1}$ .** Yield: 90 %.  $^{15}\text{N}$  NMR (50.70 MHz, H<sub>2</sub>O/D<sub>2</sub>O 9/1):  $\delta$  -33.8 ppm with satellite peaks at -31.2 ppm and -36.6 ppm ( $^1J_{\text{Pt-N}} = 274$  Hz and  $^2J_{\text{Pt-H}} = 52$  Hz). ESI-MS (positive ion mode): 336 *m/z* [M+H]<sup>+</sup>. Calc. for [Cl<sub>2</sub>H<sub>9</sub> $^{15}\text{N}_2\text{O}_2\text{Pt}$ ]<sup>+</sup> 336 *m/z* [M+H]<sup>+</sup>.

**$^{15}\text{N-2}$ .** Yield: 85 %.  $^{15}\text{N}$  NMR (50.70 MHz, H<sub>2</sub>O/D<sub>2</sub>O 9/1):  $\delta$  -35.6 ppm with satellite peaks at -32.9 ppm and -38.2 ppm ( $^1J_{\text{Pt-N}} = 273$  Hz and  $^2J_{\text{Pt-H}} = 54$  Hz). ESI-MS (positive ion mode): 379 *m/z* [M+H]<sup>+</sup>. Calc. for [C<sub>2</sub>H<sub>11</sub>Cl<sub>2</sub> $^{15}\text{N}_2\text{O}_3\text{Pt}$ ]<sup>+</sup> 379 *m/z* [M+H]<sup>+</sup>.

**$^{15}\text{N-3}$ .** Yield: 80 %.  $^{15}\text{N}$  NMR (50.70 MHz, H<sub>2</sub>O/D<sub>2</sub>O 9/1):  $\delta$  -39.6 ppm with satellite peaks at -37.0 ppm and -42.5 ppm ( $^1J_{\text{Pt-N}} = 265$  Hz and  $^2J_{\text{Pt-H}} = 54$  Hz). ESI-MS (negative ion mode): 418 *m/z* [M-H]<sup>-</sup>. Calc. for [C<sub>4</sub>H<sub>11</sub>Cl<sub>2</sub> $^{15}\text{N}_2\text{O}_4\text{Pt}$ ]<sup>-</sup> 418 *m/z* [M-H]<sup>-</sup>.

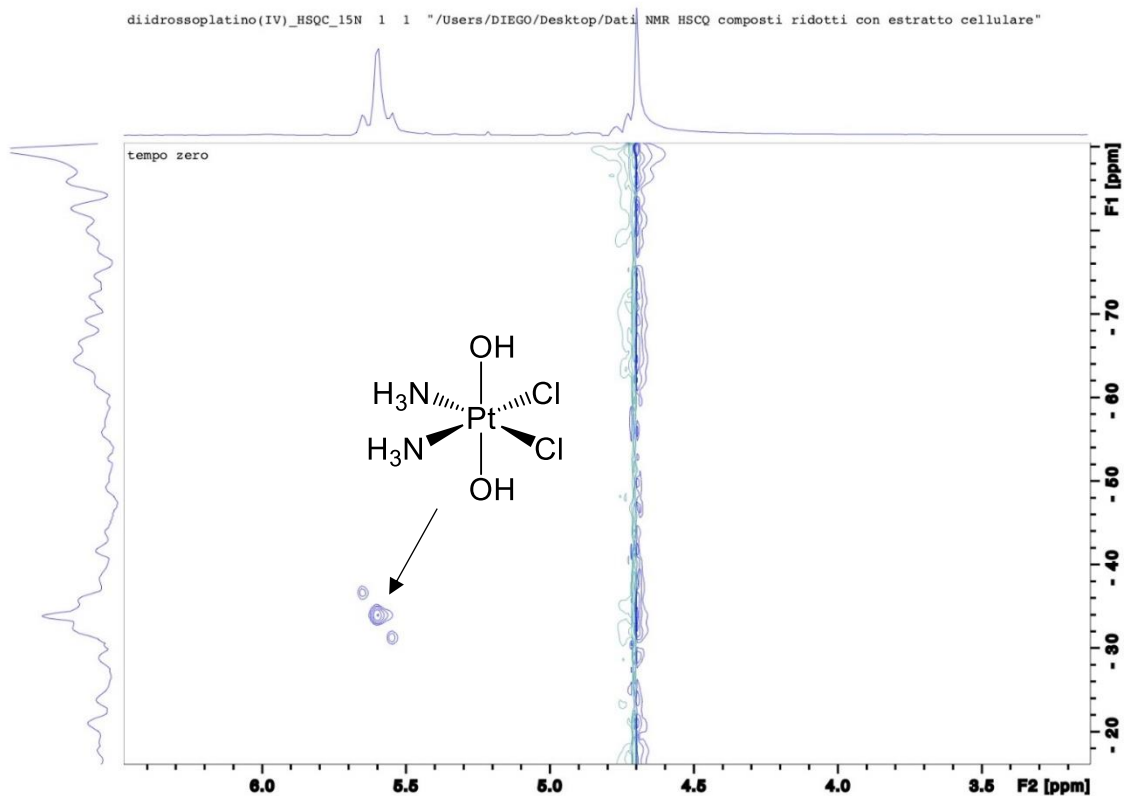

**Figure S2** [ $^1\text{H}$ ,  $^{15}\text{N}$ ] HSQC spectrum of  $^{15}\text{N}$ -1 in  $\text{H}_2\text{O}/\text{D}_2\text{O}$  9/1.

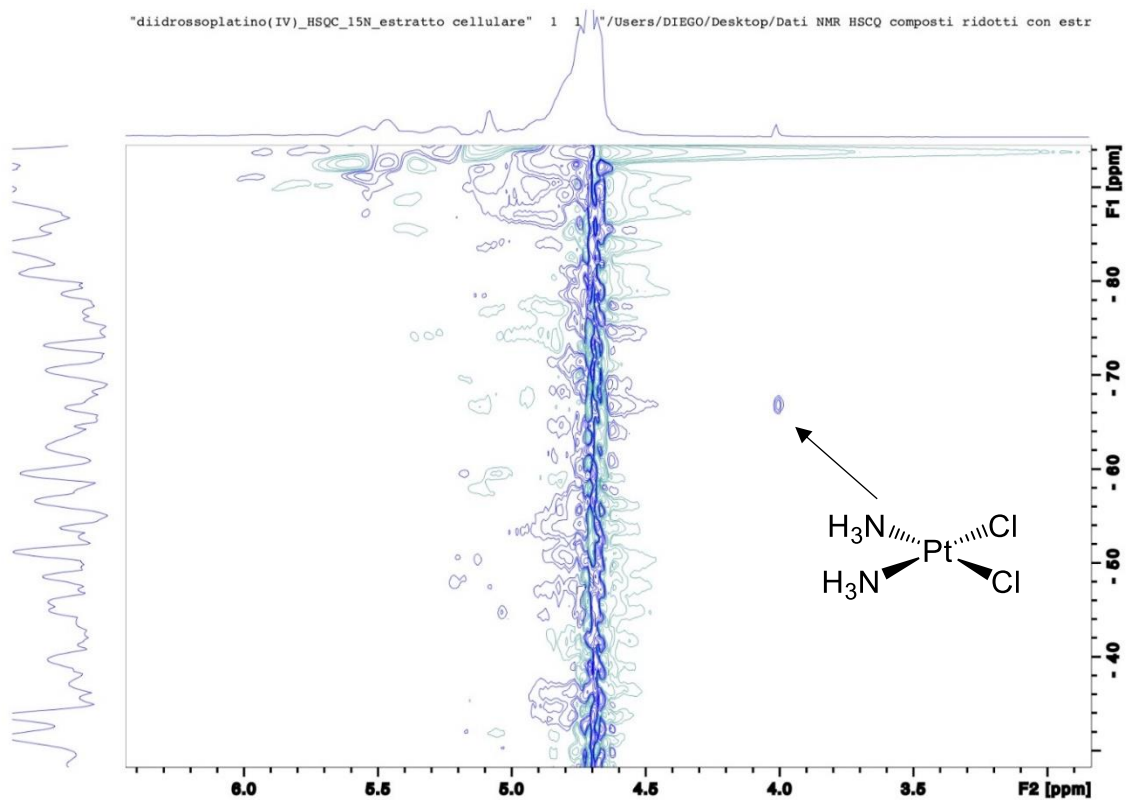

**Figure S3** [ $^1\text{H}$ ,  $^{15}\text{N}$ ] HSQC spectrum of  $^{15}\text{N}$ -1 after 2 h reduction in cell cytosol.

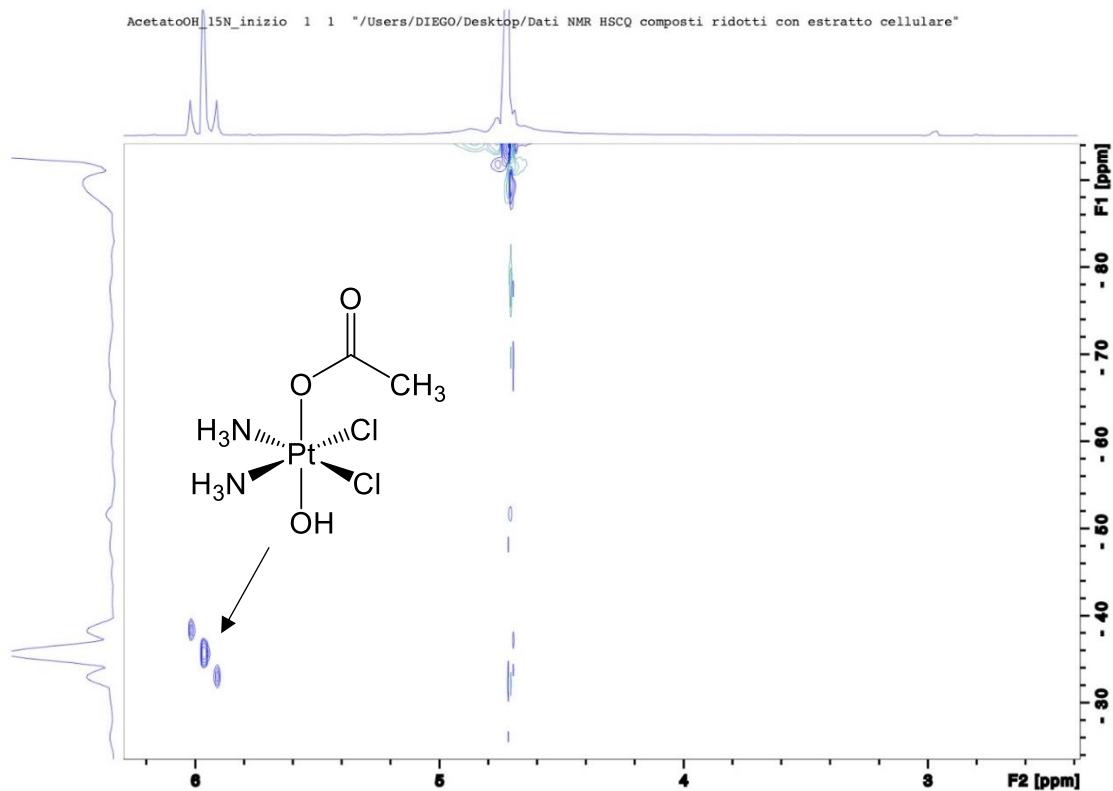

Figure S4  $[^1\text{H}, ^{15}\text{N}]$  HSQC spectrum of  $^{15}\text{N}$ -2 in  $\text{H}_2\text{O}/\text{D}_2\text{O}$  9/1.

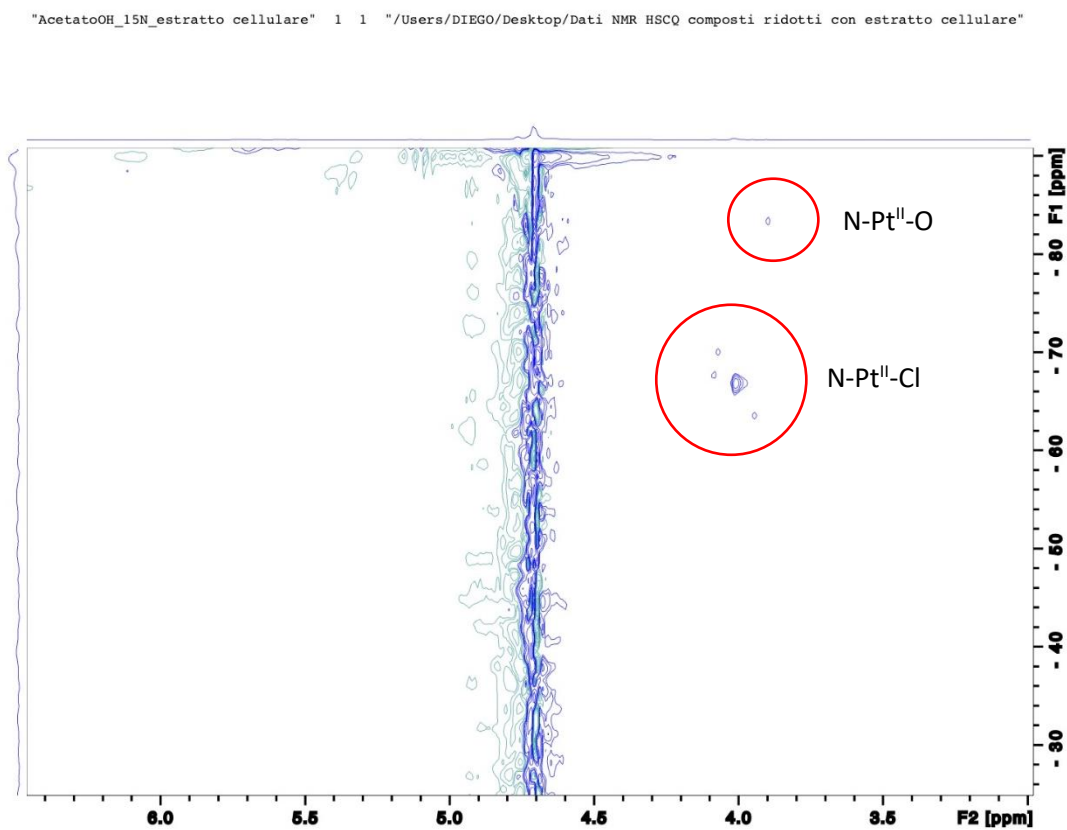

Figure S5  $[^1\text{H}, ^{15}\text{N}]$  HSQC spectrum of  $^{15}\text{N}$ -2 after 2 h reduction in cell cytosol.

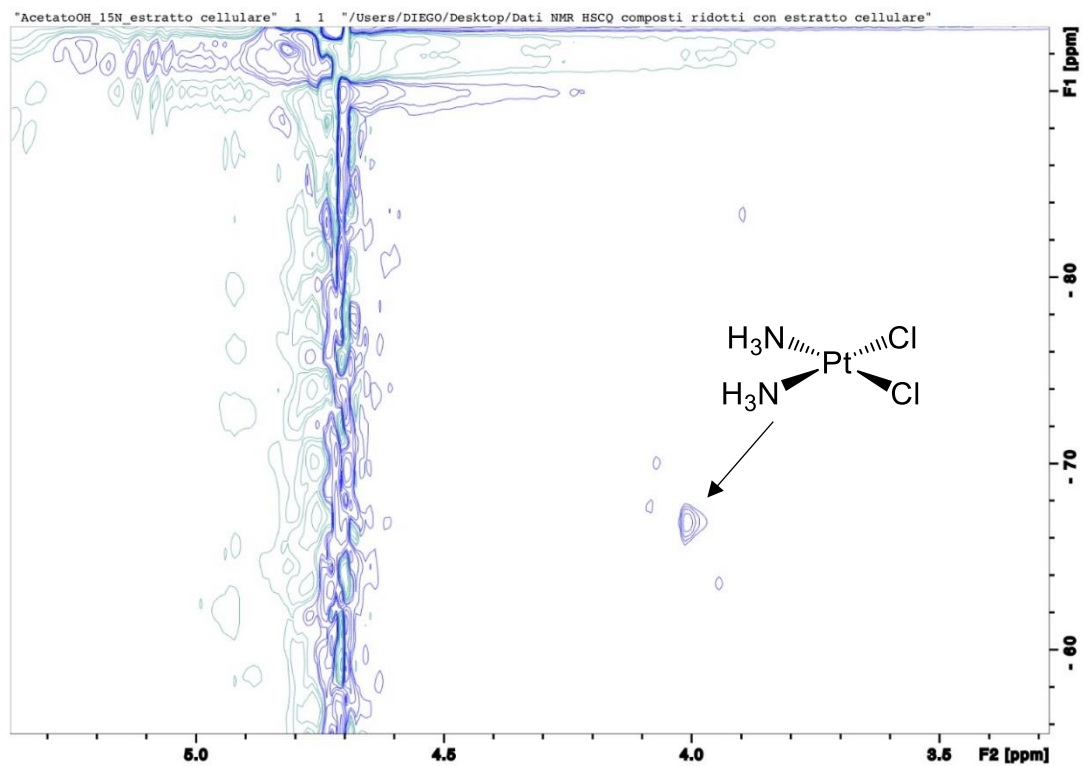

**Figure S6** [ $^1\text{H}$ ,  $^{15}\text{N}$ ] HSQC spectrum of  $^{15}\text{N}$ -2 after 2 h reduction in cell cytosol (magnification).

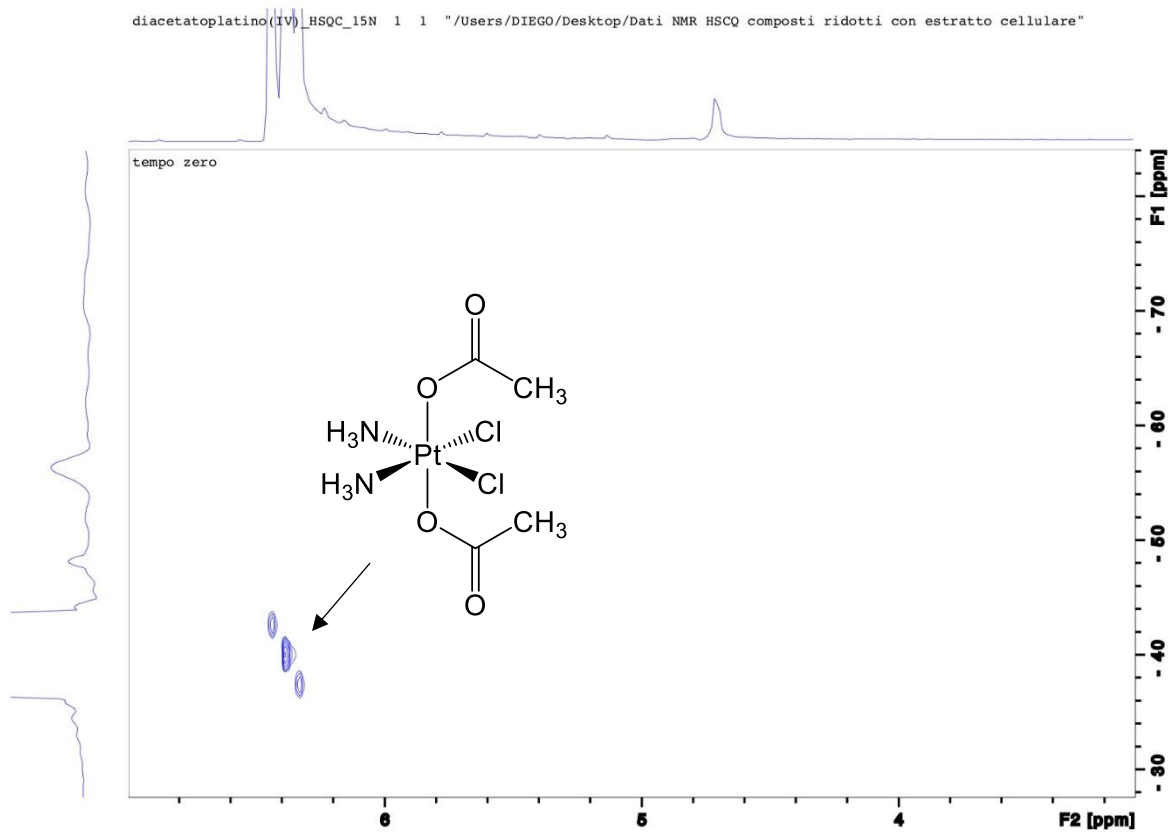

**Figure S7** [ $^1\text{H}$ ,  $^{15}\text{N}$ ] HSQC spectrum of  $^{15}\text{N}$ -3 in  $\text{H}_2\text{O}/\text{D}_2\text{O}$  9/1.

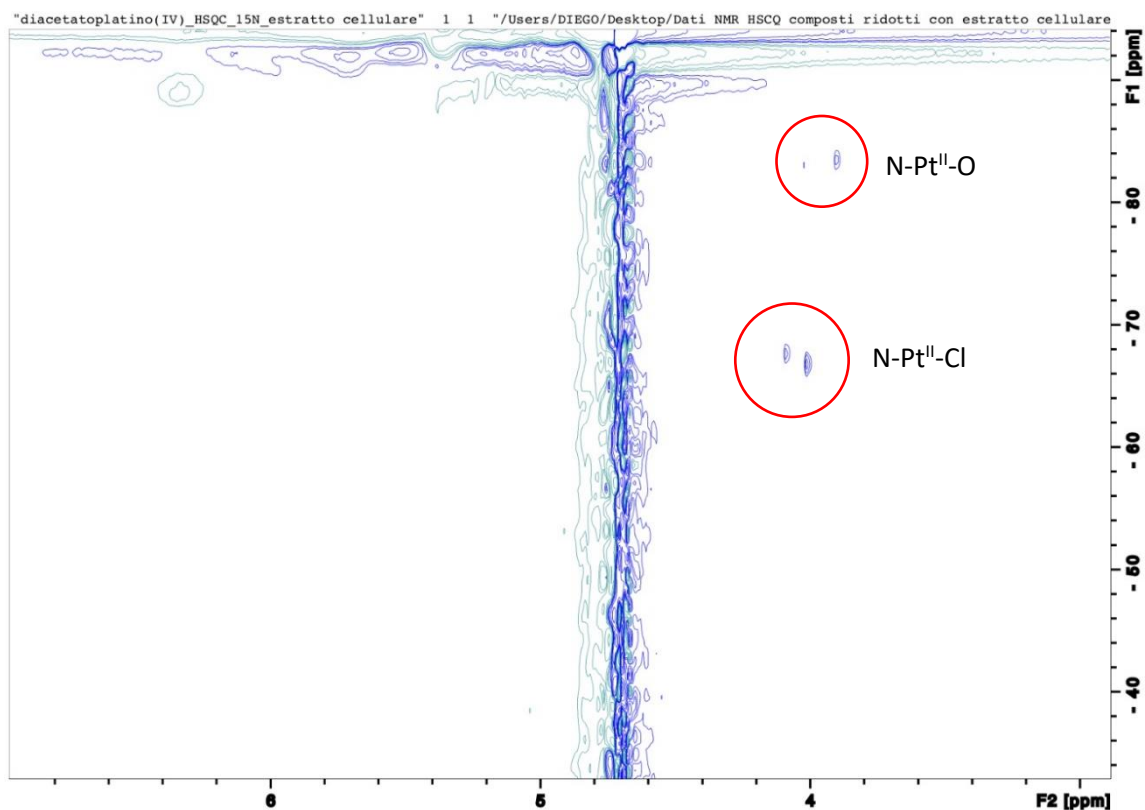

**Figure S8** [<sup>1</sup>H, <sup>15</sup>N] HSQC spectrum of <sup>15</sup>N-3 after 2 h reduction in cell cytosol.

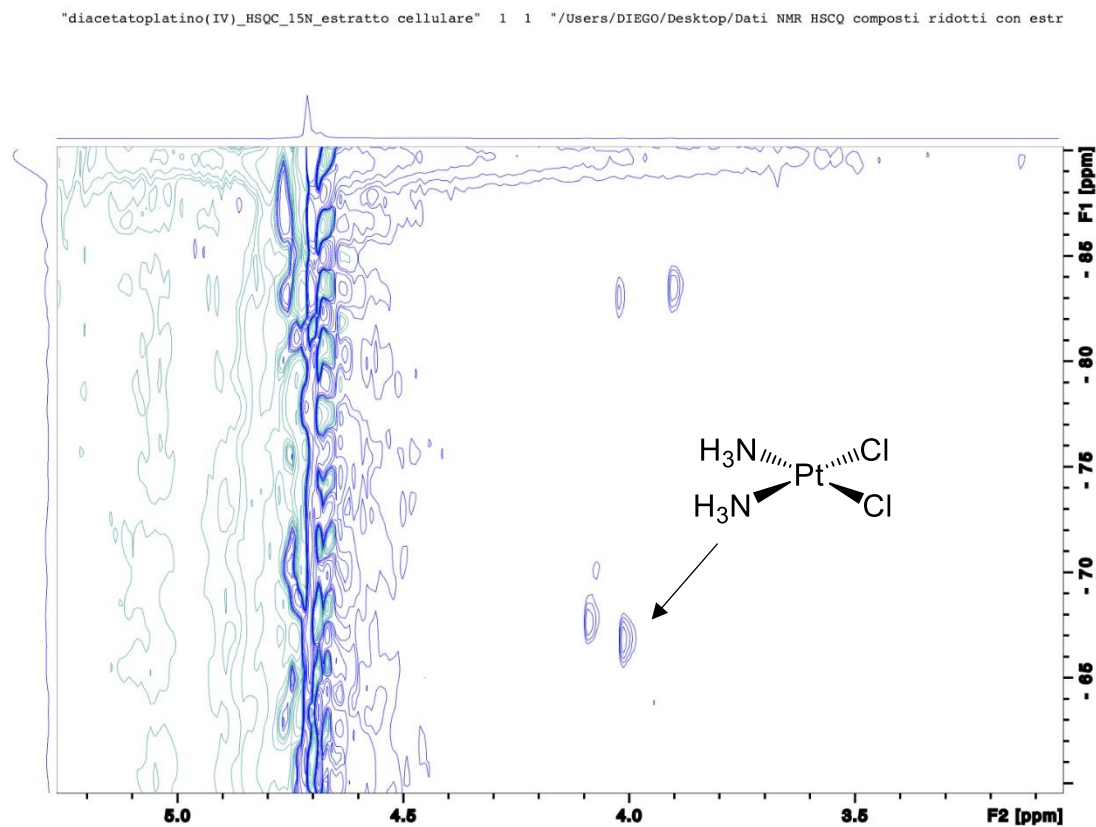

**Figure S9** [<sup>1</sup>H, <sup>15</sup>N] HSQC spectrum of <sup>15</sup>N-3 after 2 h reduction in cell cytosol (magnification).

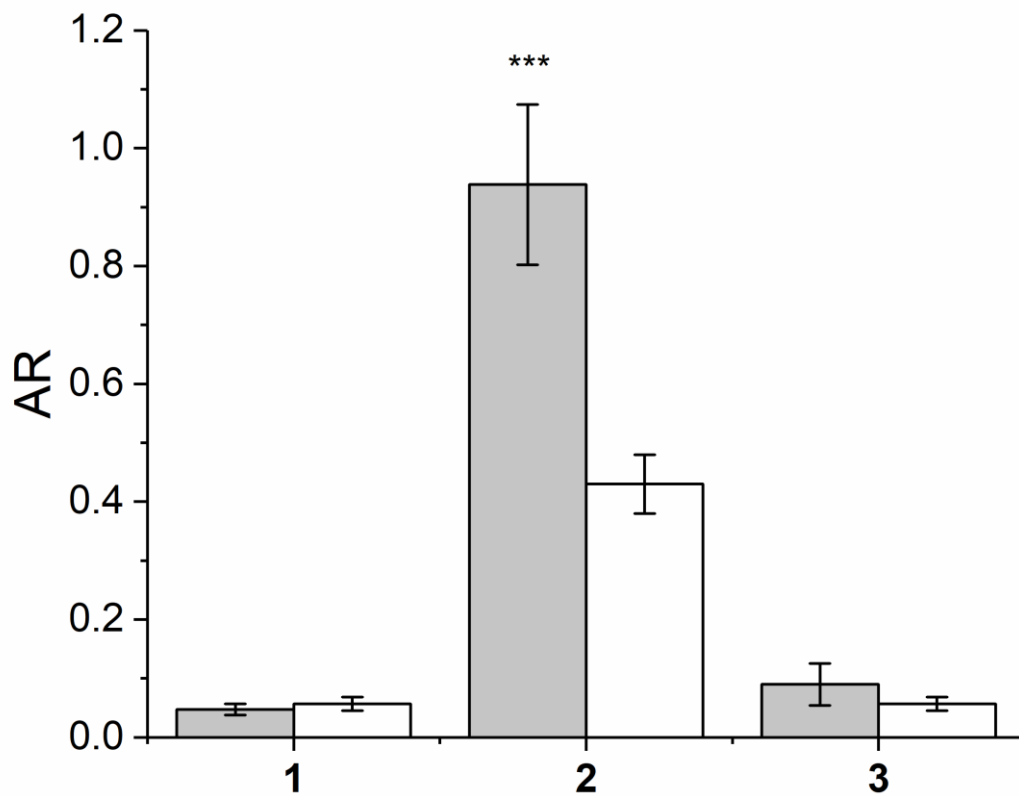

**Figure S10** Accumulation ratio (AR) in A2780 cells treated for 1 h with **1-3** (10  $\mu$ M) in the absence (gray bars) or in the presence (white bars) of cimetidine (CMT, co-treatment, 1.5 mM). Data are the mean  $\pm$  sd of three independent replicates and were compared using one-way analysis of variance (ANOVA) with Tukey post-hoc test. Statistical analysis (in presence vs. in absence of CMT): no indication = not significant; \*\*\*p < 0.001).

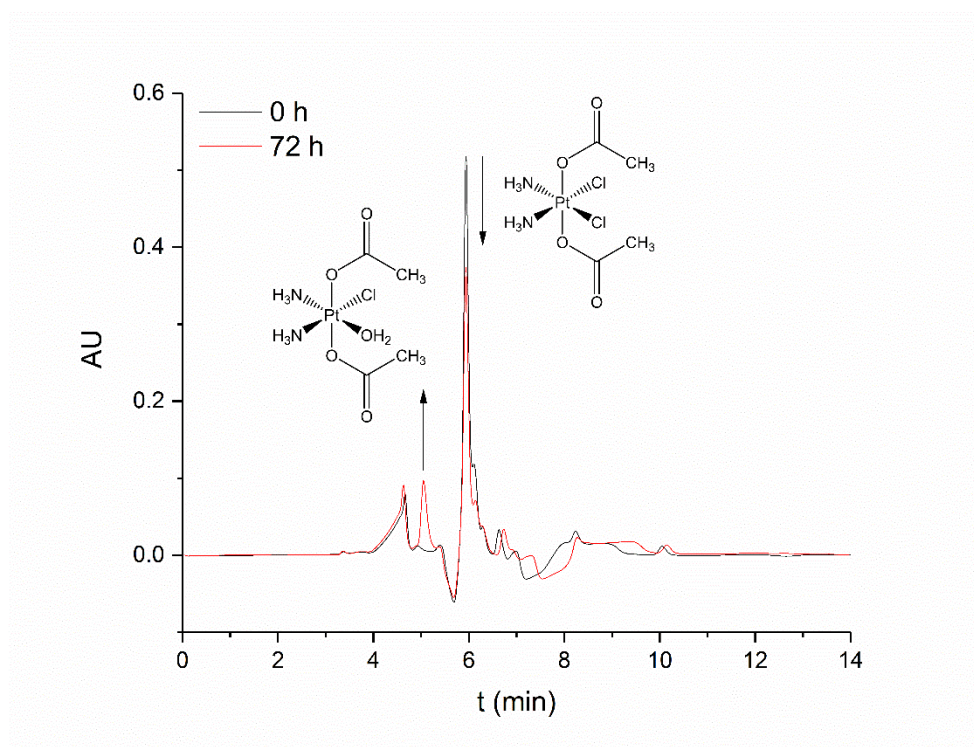

**Figure S11** RP-HPLC chromatograms of **3** (100  $\mu\text{M}$ ) aged in complete RPMI 1640 medium at time zero and after 72 h in solution.



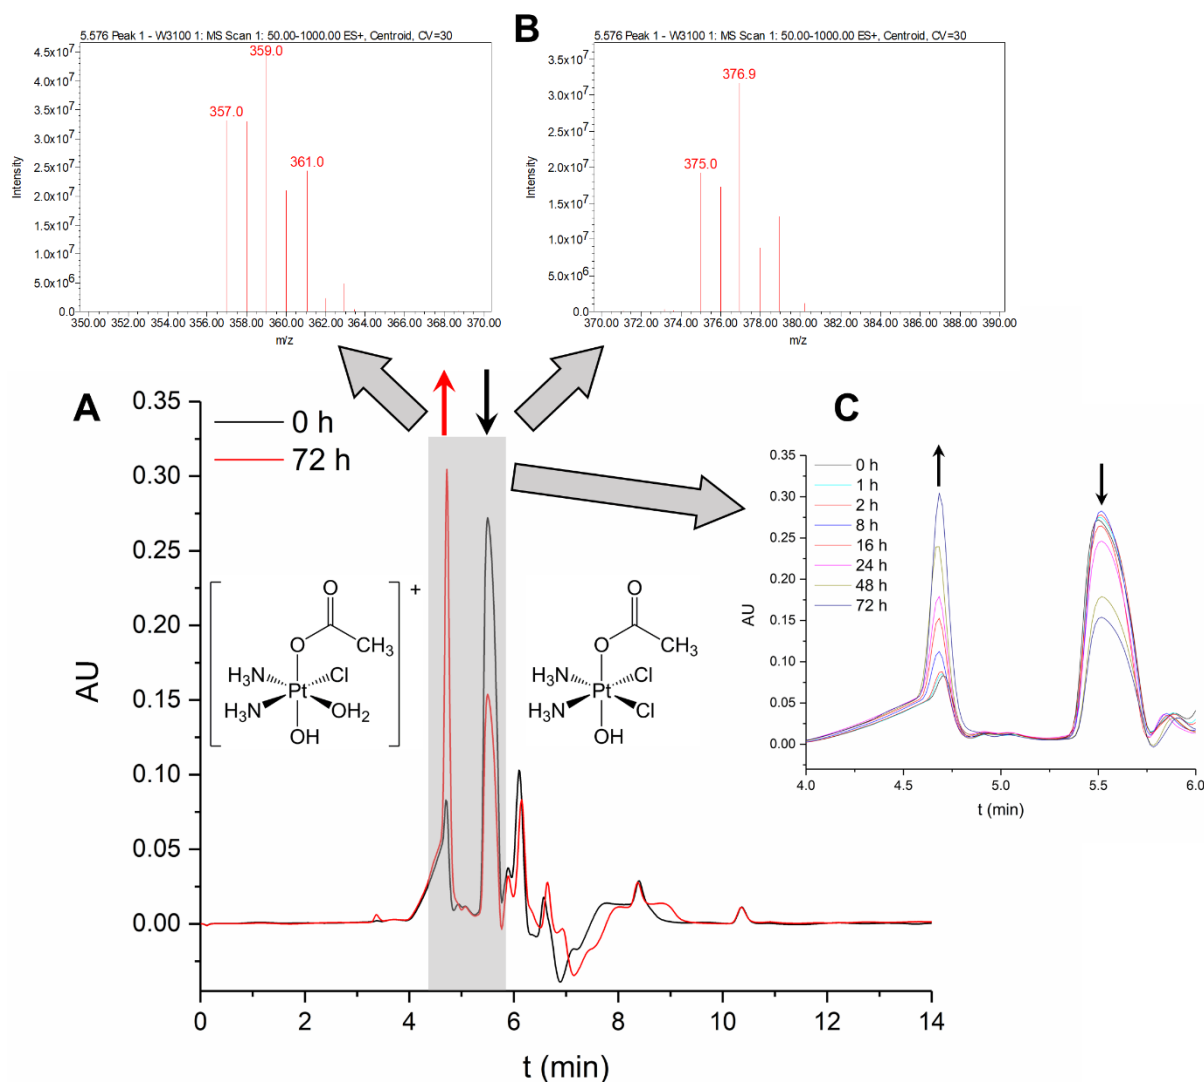

**Figure S12** (A) RP-HPLC chromatograms of **2** (100  $\mu$ M) aged in complete RPMI 1640 medium at time zero and after 72 h in solution. In the gray box, the two peaks belonging to **2** and its hydrolyzed derivative  $[\mathbf{2}\text{-Cl}+\text{H}_2\text{O}]^+$  are present. (B) ESI-MS spectra of **2** and  $[\mathbf{2}\text{-Cl}+\text{H}_2\text{O}]^+$ . (C) Zoomed-in version of A in the gray box area containing the chromatograms at  $t = 0$  and 72 h, and those obtained at intermediate aging times. (Note: the peaks below 0.10 AU intensity belong to the medium, and partially overlap the peaks of interest, but the hyphenated technique permits identification of the Pt species).
